# Supplementary material
Source: PubMed Central journal article supplement (PMC10043923)

Figure S1

A

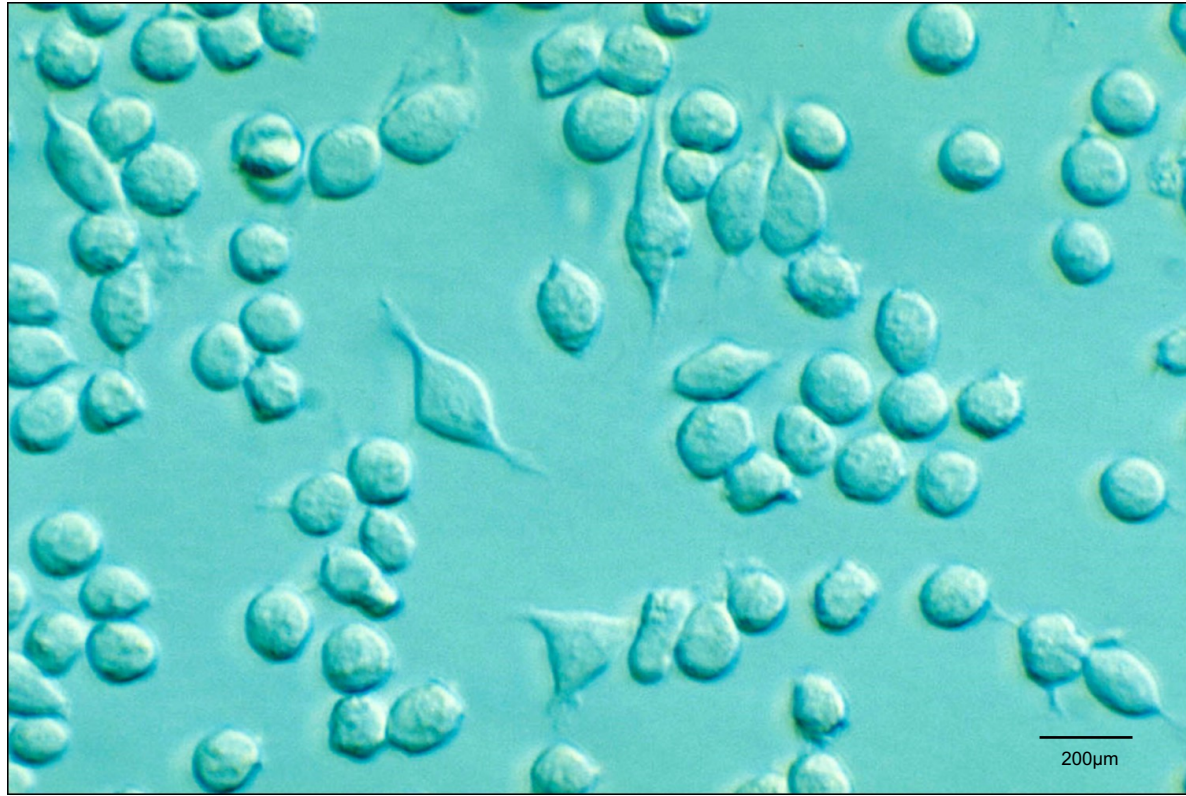

B

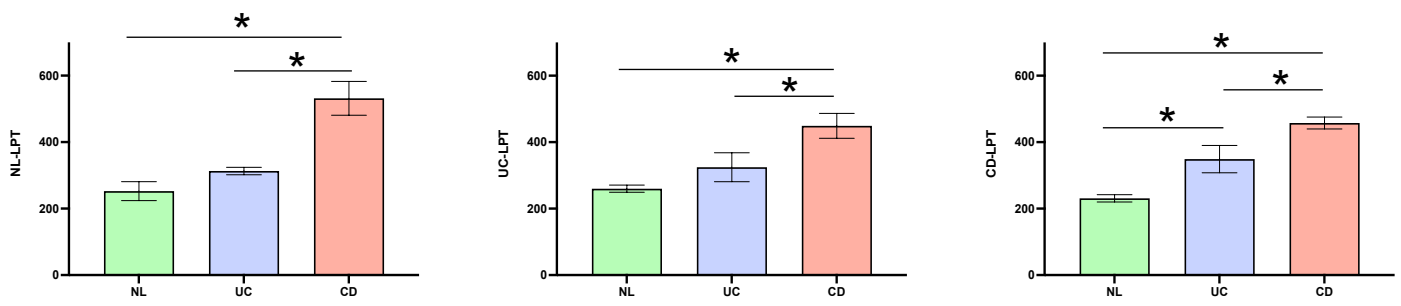

A

Relative Abundance of ECM identified in NL, UC and CD HIMF derived Matrix

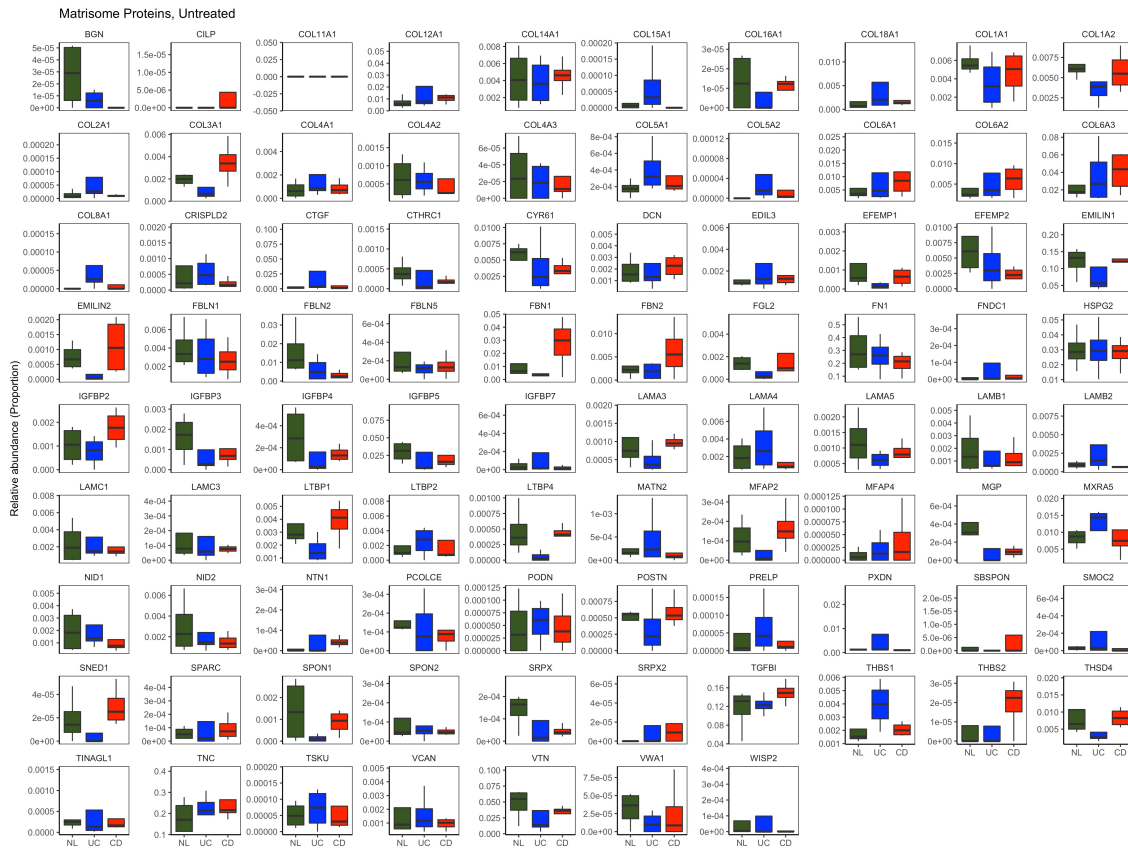

B

Relative Abundance of ECM identified in NL HIMF derived Matrix with Cytokine Stimulations

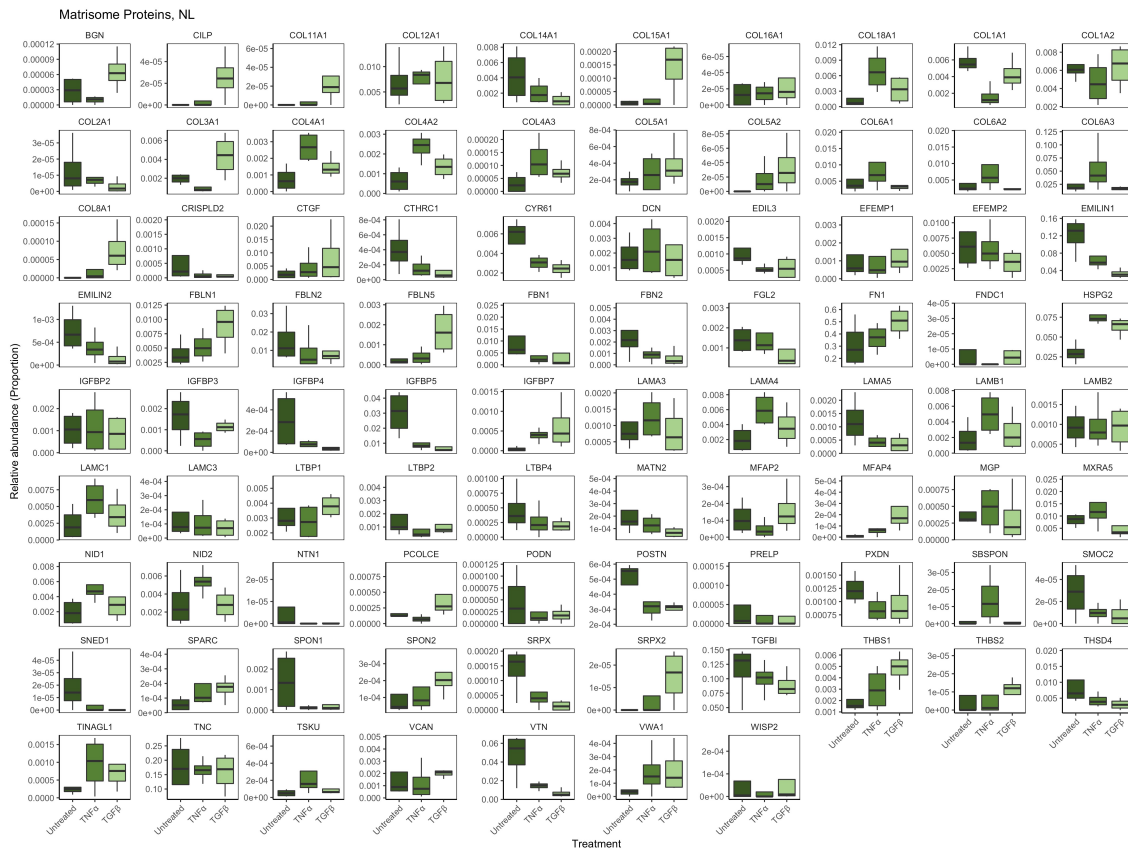

**Figure S3**

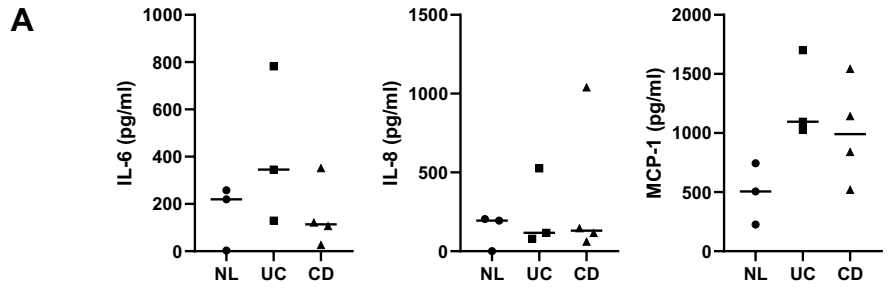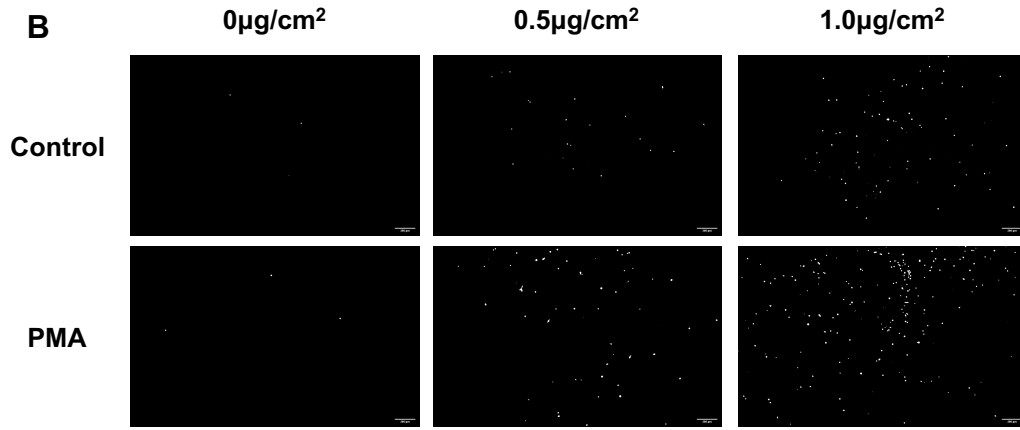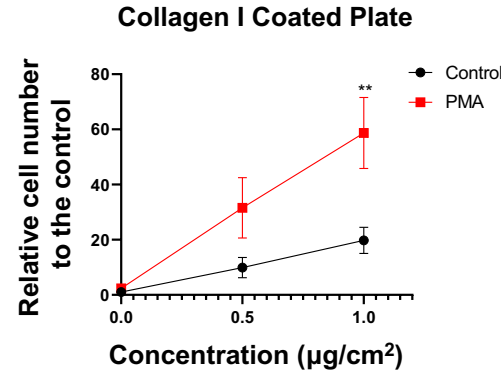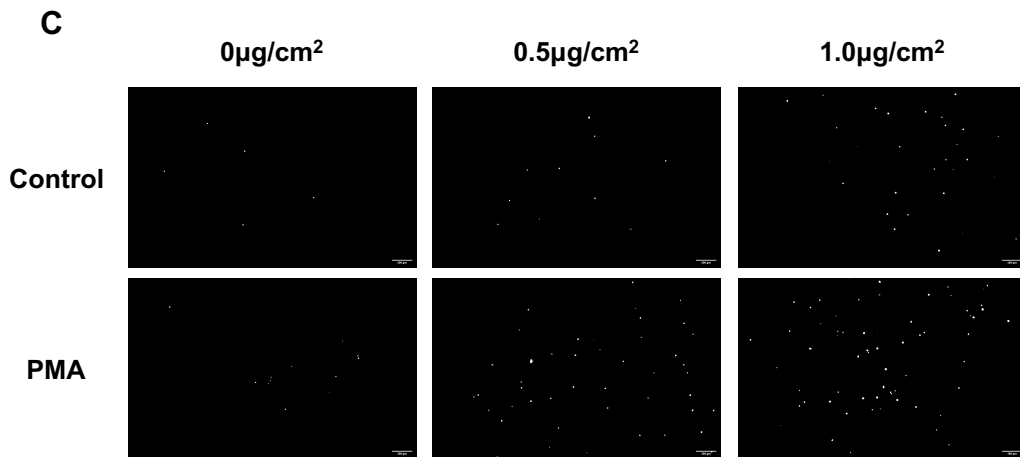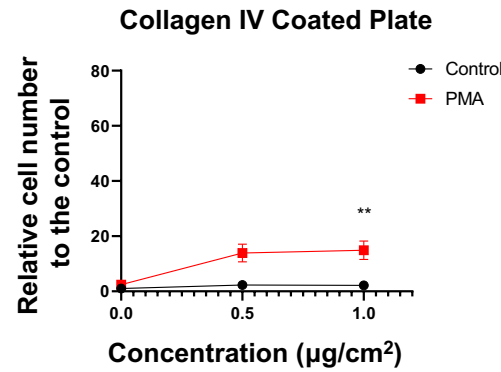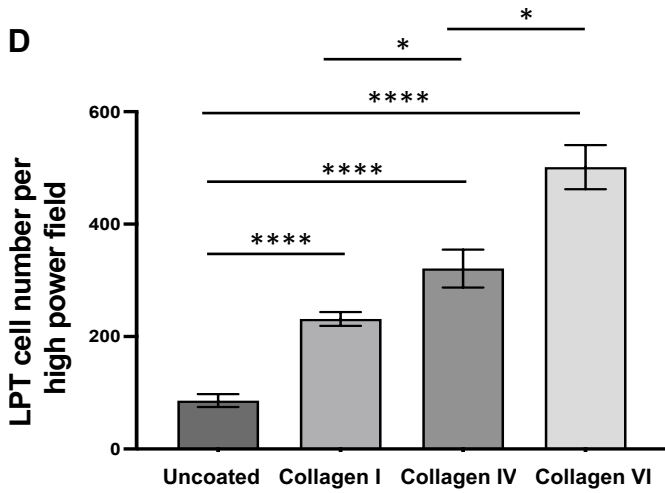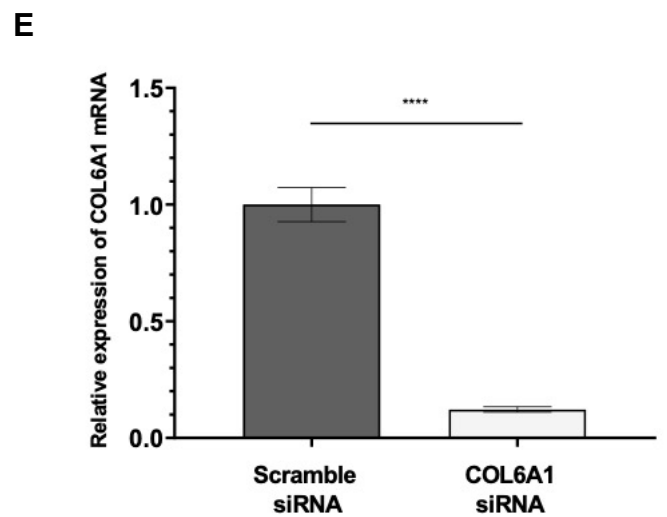

Figure S4

A

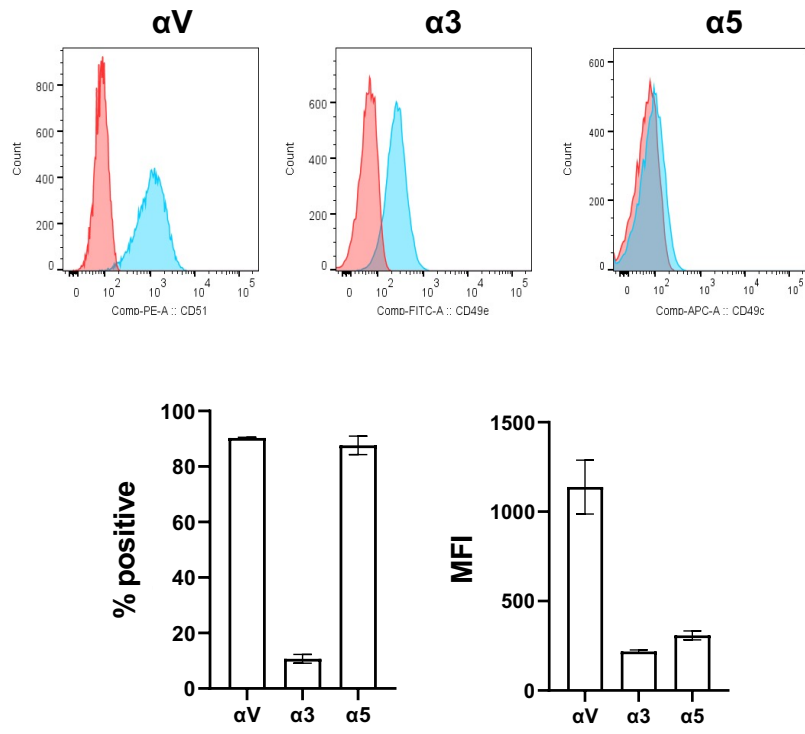

B

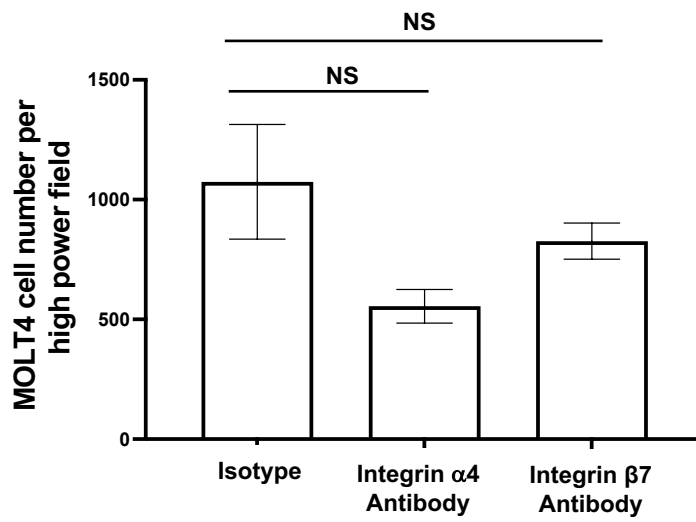

C

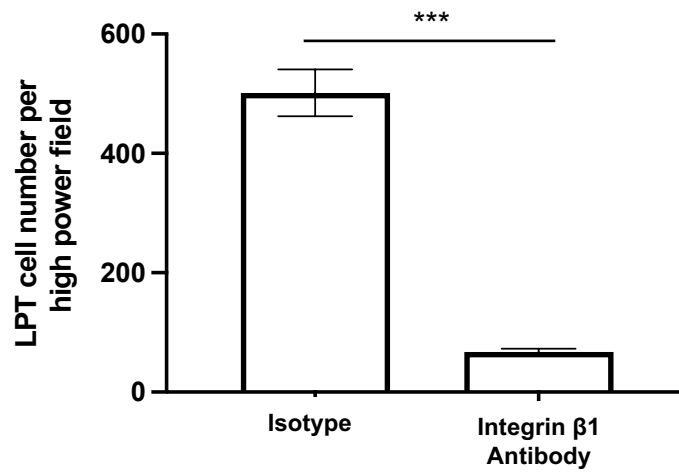

Figure S5

A

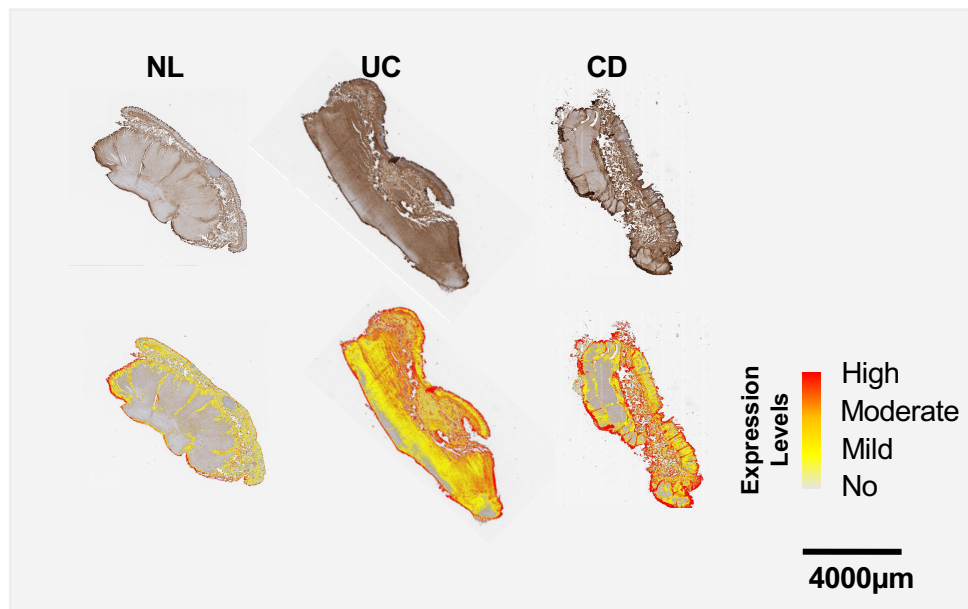

B

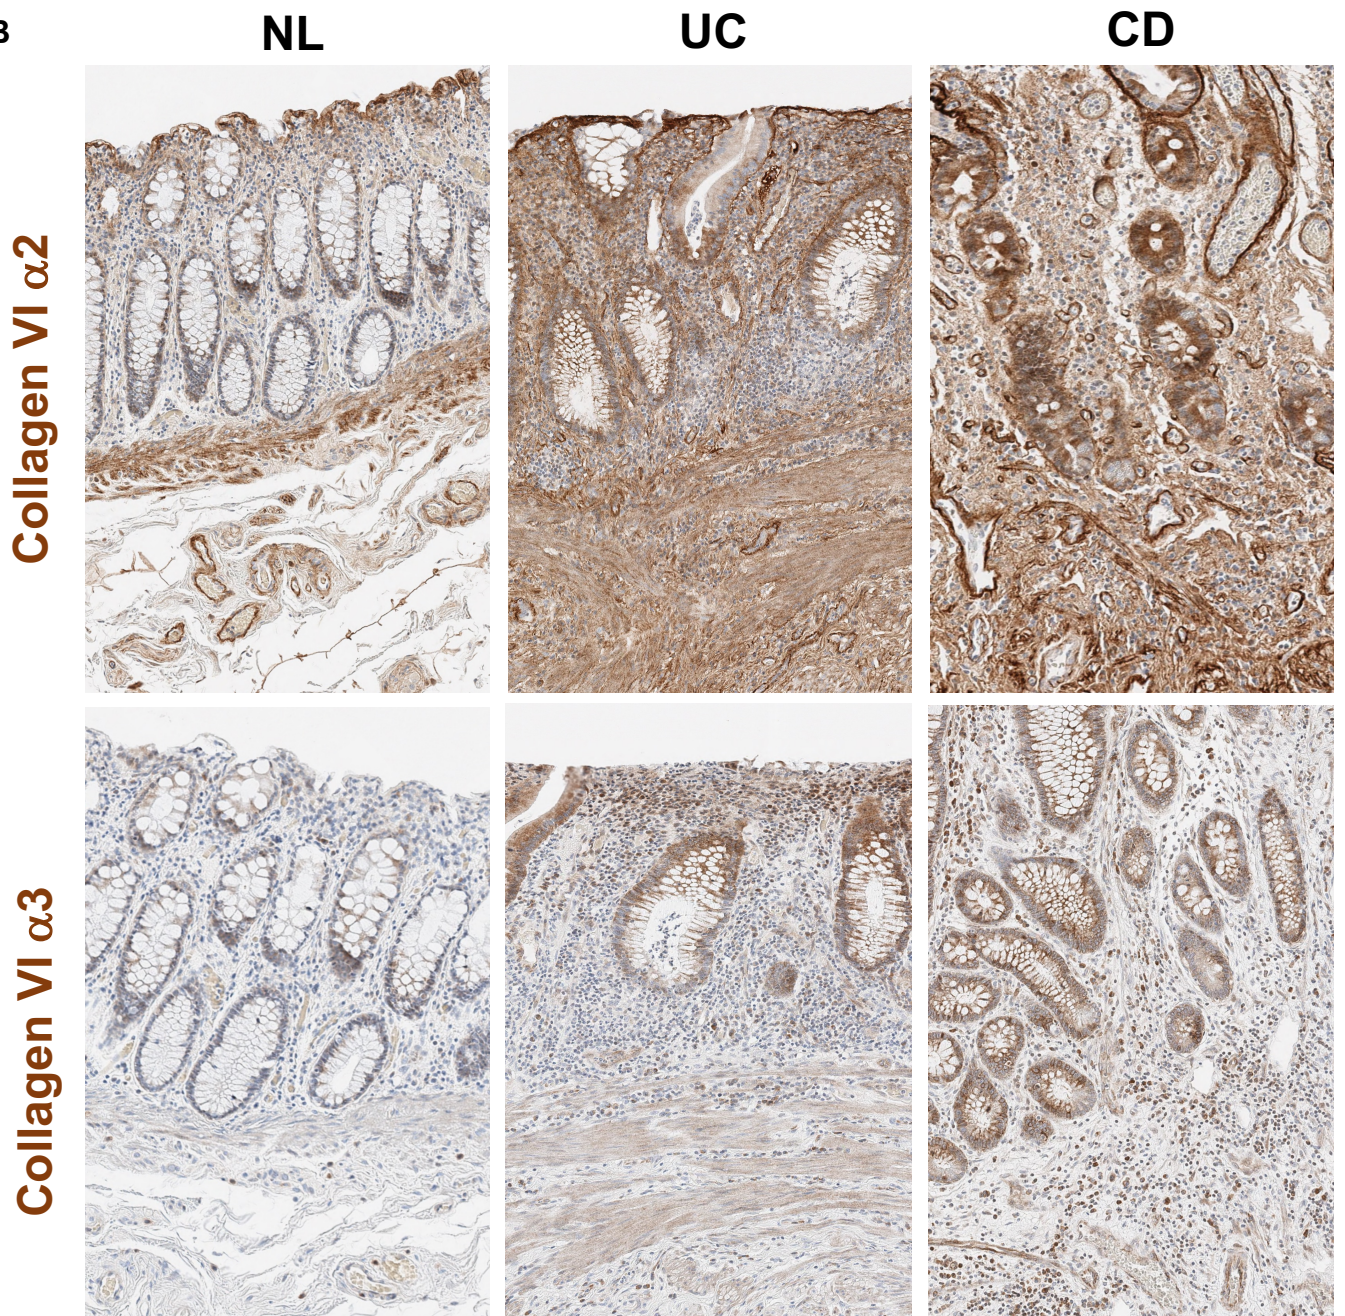

Figure S6

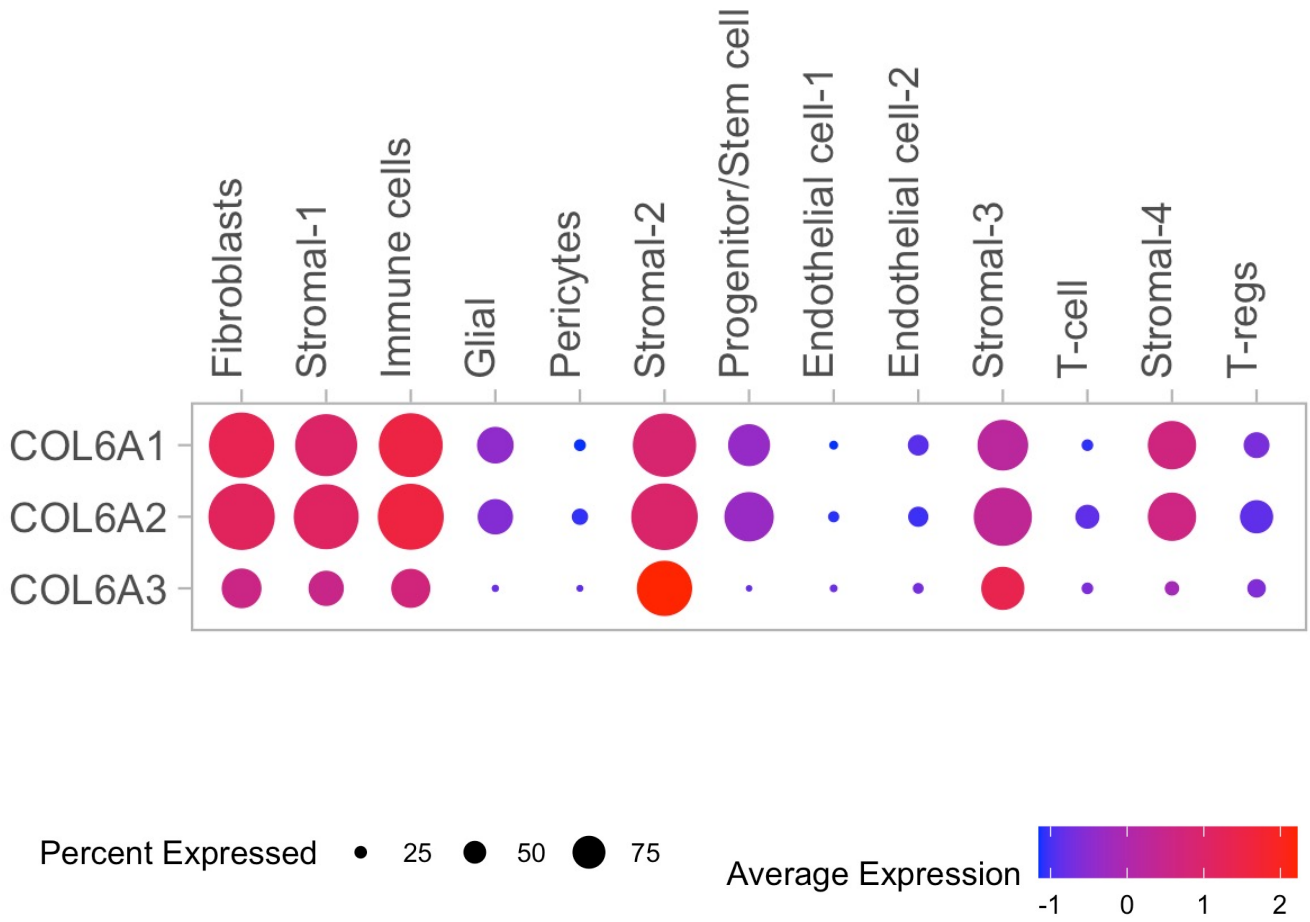

Figure S7

A

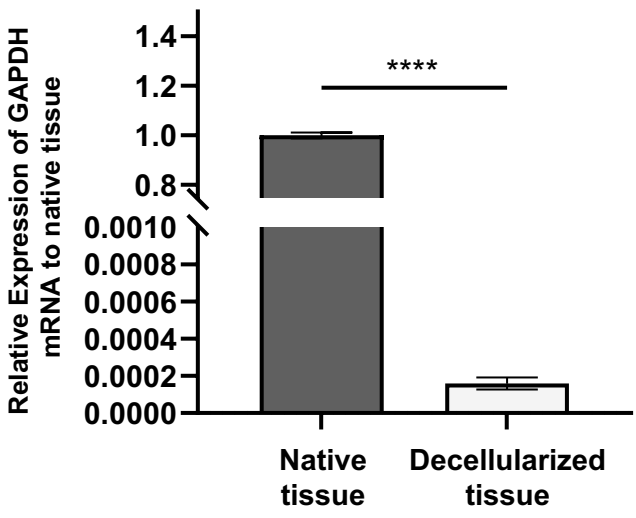

B

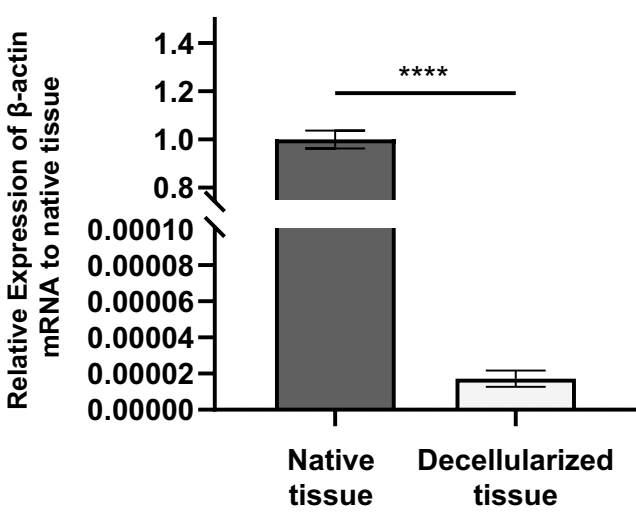

**Figure S8**

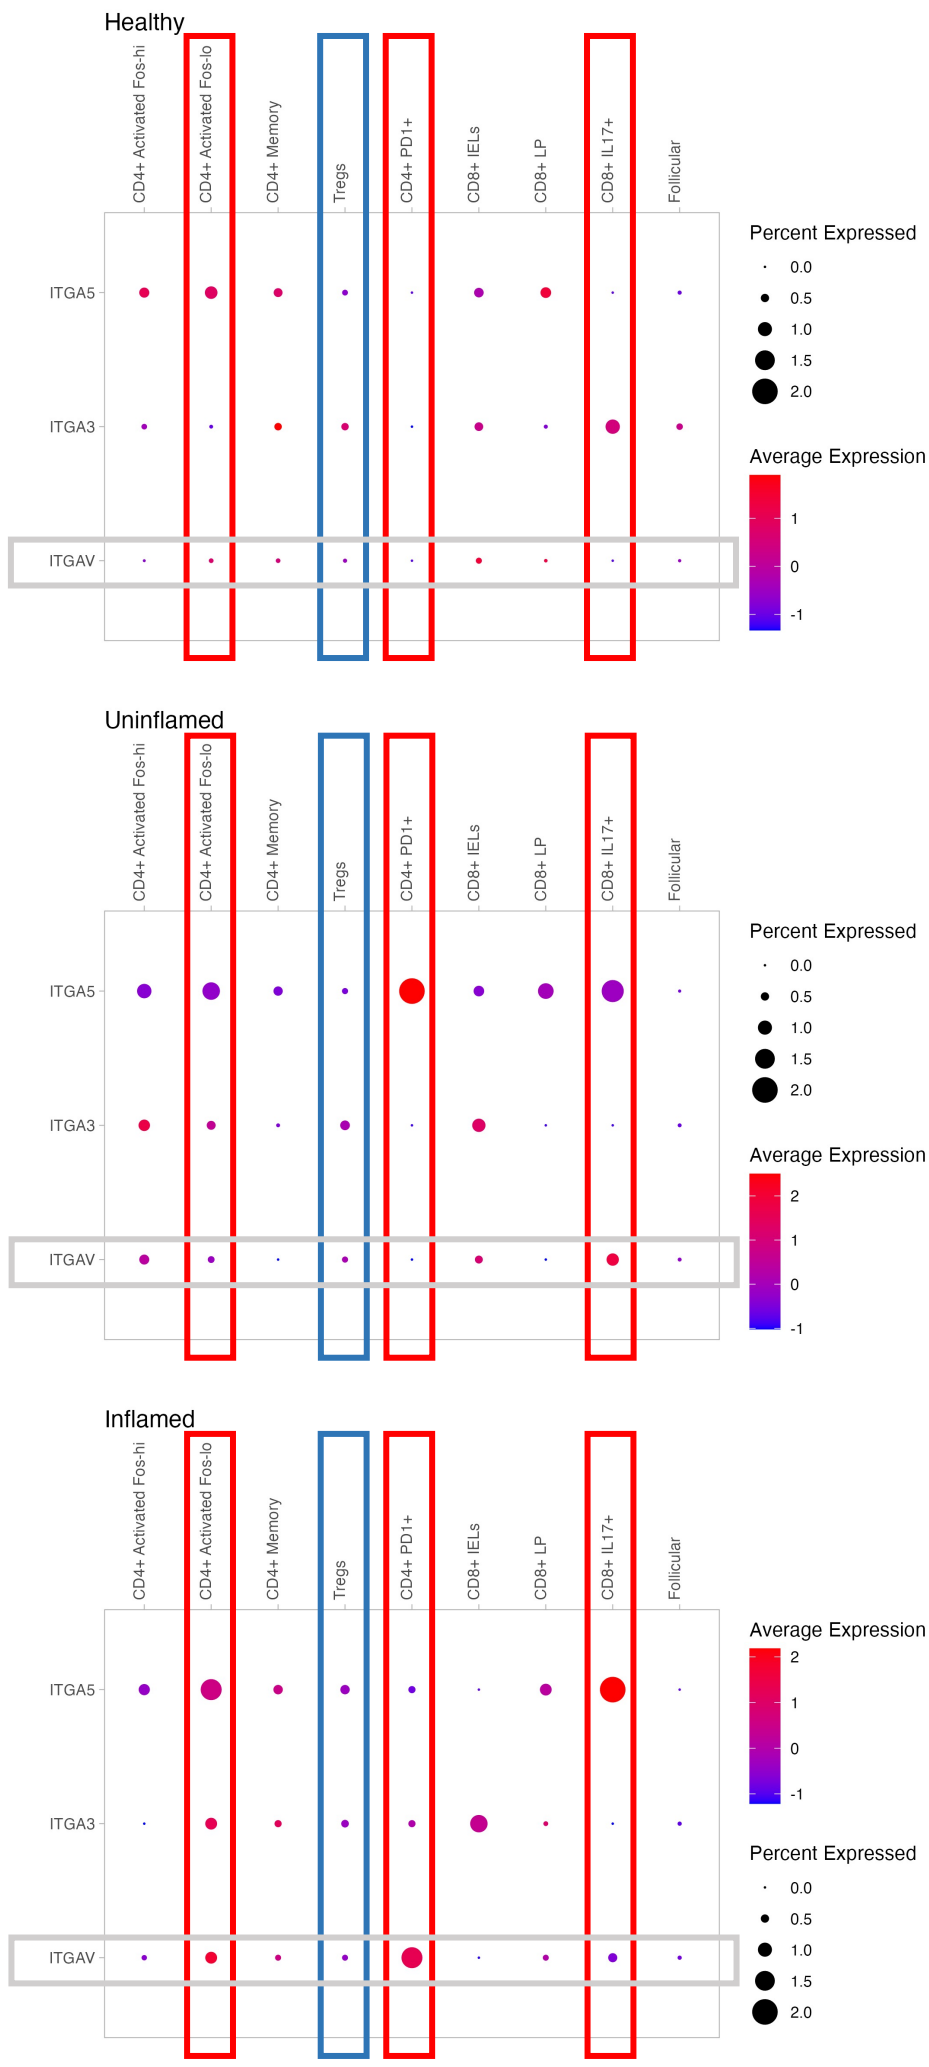

Supplement: NIHMS1877030-supplement-Supplementary_Material_2.pdf [file NIHMS1877030-supplement-Supplementary_Material_2.pdf]
